# Supplementary material
Source: HighWire-hosted journal article supplement (https://bmjopenquality.bmj.com/highwire/filestream/136221/field_highwire_adjunct_files/1/ds6454.docx)
Supplement: ds6454.docx [file ds6454.docx]

Appendix 1- Fishbone Diagram for defects identified in the hospital telephone Exchange
